# Supplementary material for: A MnFe2O4/BiVO4 film photoanode with heterojunction, co-catalytic and photothermal effects for effective solar water oxidation
Source: Royal Society of Chemistry journal article supplement (doi:10.1039/d4cy00155a), 2024-01-01
Supplement: d4cy00155a1.pdf [file d4cy00155a1.pdf]

*Electronic supplementary information*

**MnFe<sub>2</sub>O<sub>4</sub>/BiVO<sub>4</sub> film photoanode with heterojunction, co-catalytic and photothermal effects for effective solar water oxidation**

Guoqiang Shen,<sup>a</sup> Haijiao Lu<sup>b\*</sup> and Hao Chen<sup>a\*</sup>

<sup>a</sup>Hunan Provincial Key Laboratory of Two-Dimensional Materials, State Key Laboratory for Chemo/Biosensing and Chemometrics, College of Chemistry and Chemical Engineering, Hunan University, Changsha 410082, China

<sup>b</sup>Nanomaterials Centre, School of Chemical Engineering, and Australian Institute for Bioengineering and Nanotechnology, The University of Queensland, St Lucia, Queensland 4072, Australia

\*Email:

**haijiao.lu@uq.edu.au** (Haijiao Lu)

**chenhaoch@hnu.edu.cn** (Hao Chen)

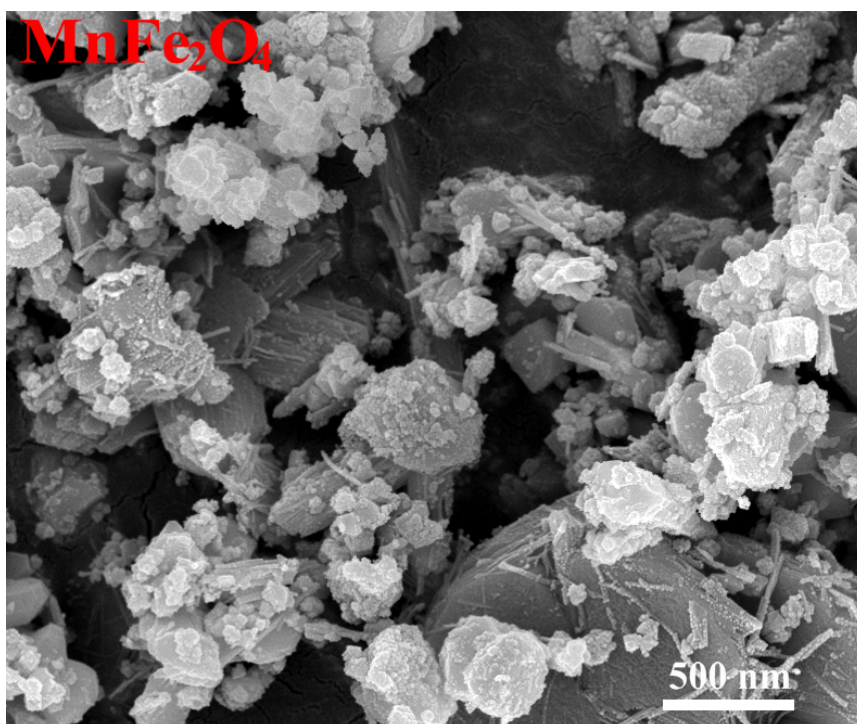

**Fig. S1** SEM image of MnFe<sub>2</sub>O<sub>4</sub> sample.

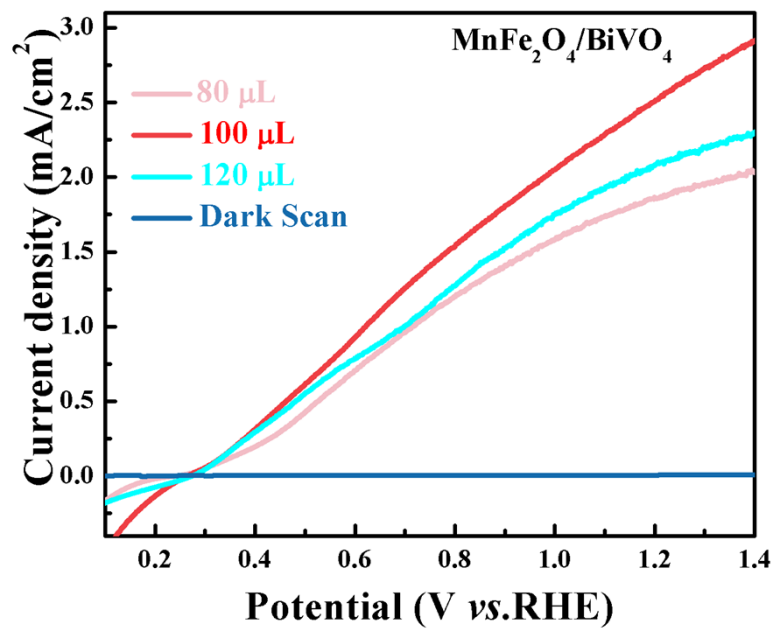

**Fig. S2** LSV curves of the  $\text{MnFe}_2\text{O}_4/\text{BiVO}_4$  films in 0.1 M NaPi under AM 1.5G irradiation. The  $\text{MnFe}_2\text{O}_4/\text{BiVO}_4$  films were prepared using different  $\text{MnFe}_2\text{O}_4$ -containing suspensions on  $\text{BiVO}_4$  film.

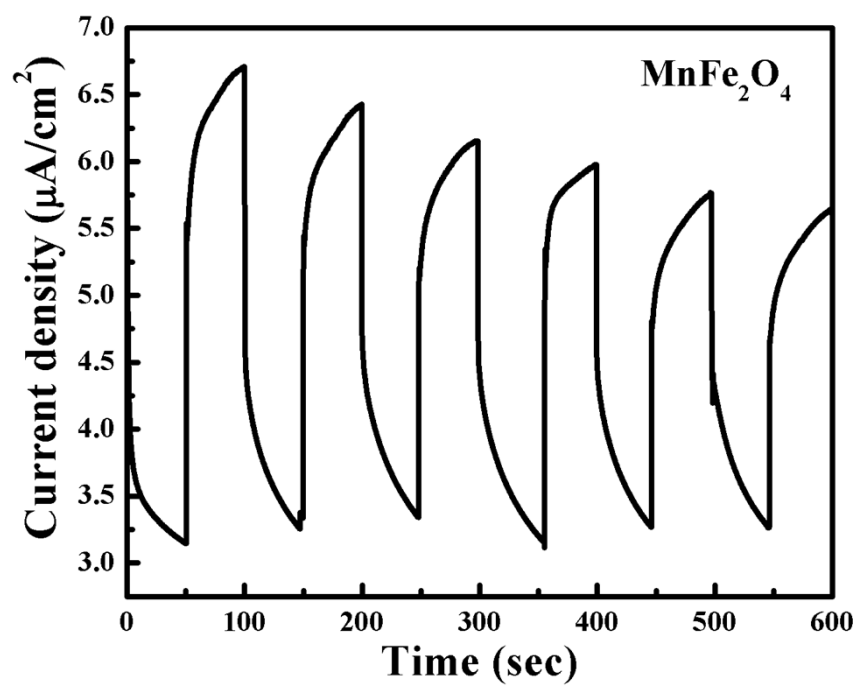

**Fig. S3** The photocurrent response of  $\text{MnFe}_2\text{O}_4$  film in 0.1 M NaPi at 1.23 V vs. RHE under AM 1.5G irradiation.

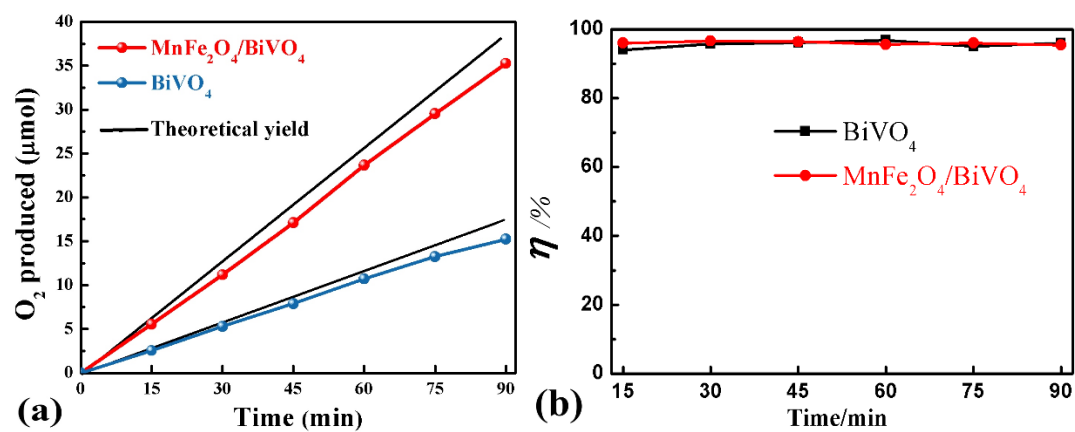

**Fig. S4** (a) The curves of O<sub>2</sub> generation vs. reaction time, and (b) faradic efficiency of oxygen evolution reaction on BiVO<sub>4</sub> and MnFe<sub>2</sub>O<sub>4</sub>/BiVO<sub>4</sub> film photoelectrode in 0.1 M NaPi under AM 1.5G irradiation at 1.23 V vs. RHE.

**Table S1** The activity comparison of the present MnFe<sub>2</sub>O<sub>4</sub>/BiVO<sub>4</sub> photoanode to the BiVO<sub>4</sub>-based photoanodes in recent reports.

| Photoanode                                            | Testing electrolyte                            | $J$ (mA cm <sup>-2</sup> )<br>At 1.23 V vs. RHE | Year of<br>publication | Ref. |
|-------------------------------------------------------|------------------------------------------------|-------------------------------------------------|------------------------|------|
| BiVO <sub>4</sub> /DLC                                | 0.5 M phosphate buffer                         | 2.39                                            | 2023                   | 1    |
| BiVO <sub>4</sub> /ZnCoMOF                            | 0.5 M Na <sub>2</sub> SO <sub>4</sub> solution | 3.08                                            | 2023                   | 2    |
| BiVO <sub>4</sub> /FeOOH                              | 0.2 M Na <sub>2</sub> SO <sub>4</sub>          | 2.02                                            | 2023                   | 3    |
| CoOx/C/BiVO <sub>4</sub>                              | 0.1 M NaPi buffer                              | 1.47                                            | 2023                   | 4    |
| BiVO <sub>4</sub> -MOF-N <sub>2</sub>                 | 0.5 M Na <sub>2</sub> SO <sub>4</sub>          | 2.32                                            | 2023                   | 5    |
| <b>MnFe<sub>2</sub>O<sub>4</sub>/BiVO<sub>4</sub></b> | <b>0.1 M NaPi buffer</b>                       | <b>2.58</b>                                     | <b>This work</b>       |      |

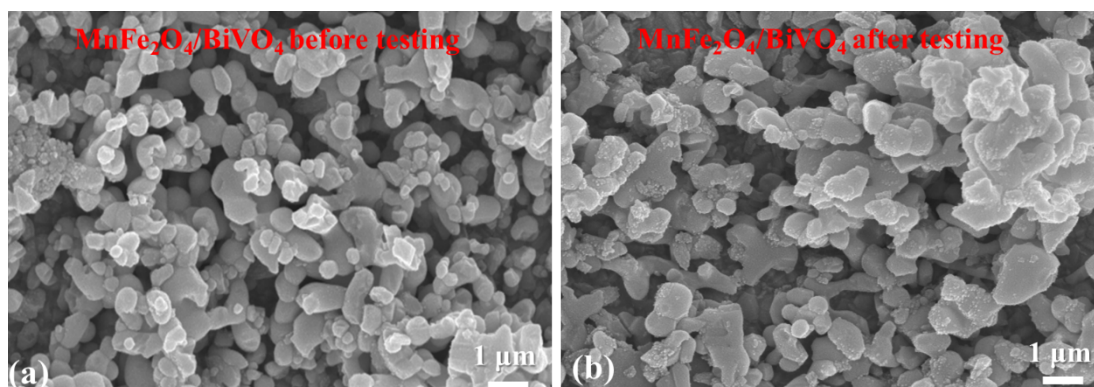

**Fig. S5** SEM image of MnFe<sub>2</sub>O<sub>4</sub>/BiVO<sub>4</sub> film photoanode (a) before and (b) after 2 h of testing in 0.1 M NaPi at 1.23 vs. RHE under AM 1.5G irradiation.

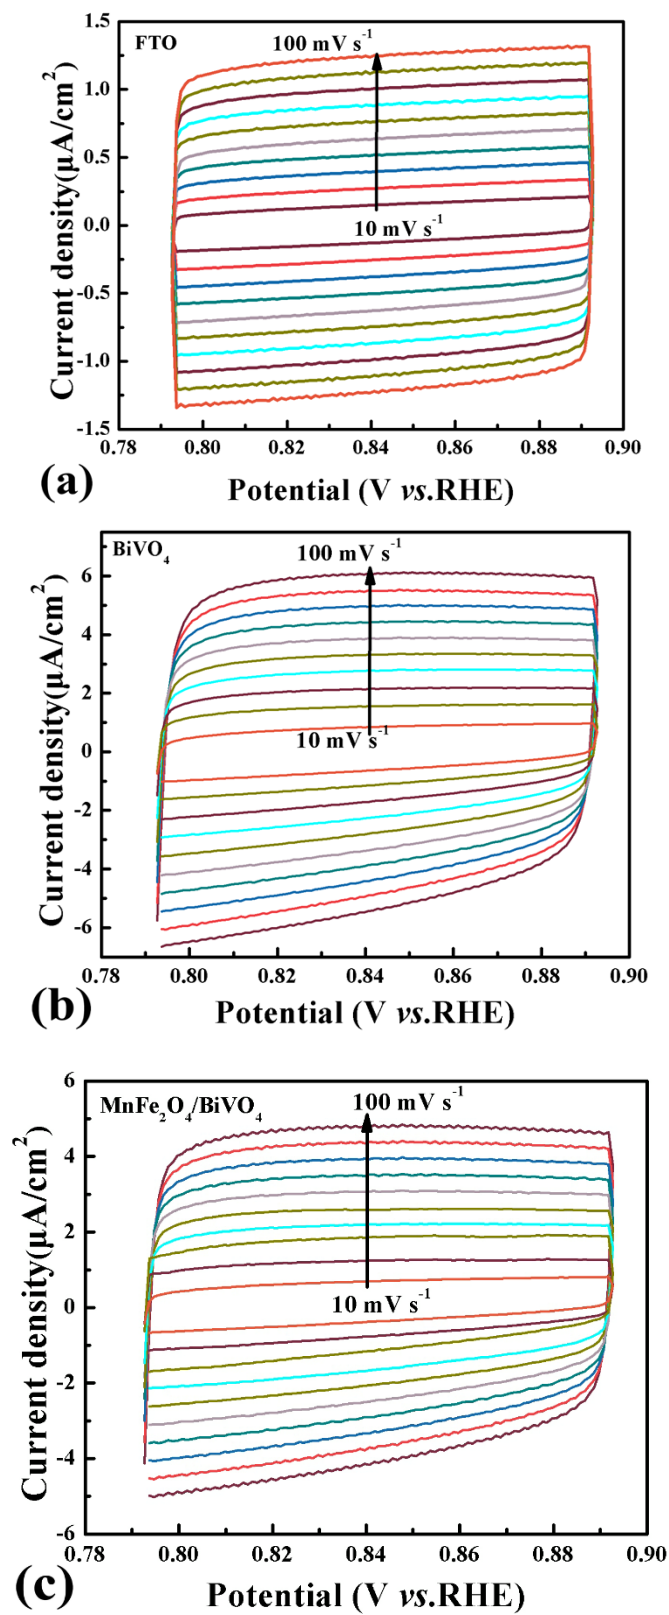

**Fig. S6** The  $\Delta I \sim \nu$  plots used for the calculation of double-layer capacitance ( $C_{dl}$ ) for (a) FTO, (b)  $\text{BiVO}_4$  and (c)  $\text{MnFe}_2\text{O}_4/\text{BiVO}_4$  electrode at 0.85 V vs. RHE.

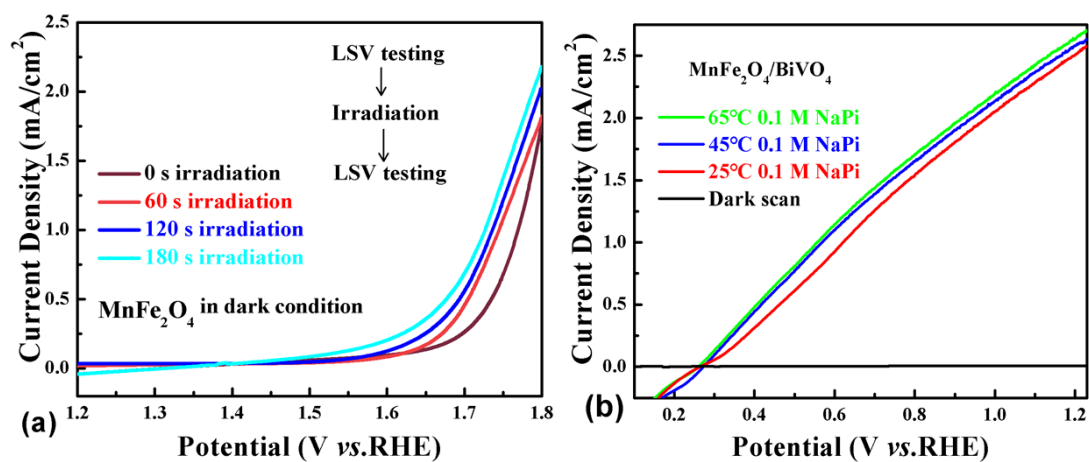

**Fig. S7** (a) LSV curves of  $\text{MnFe}_2\text{O}_4$  film electrode in 0.1 M NaPi in dark condition after different AM 1.5G irradiation times. (b) LSV curves of  $\text{MnFe}_2\text{O}_4/\text{BiVO}_4$  film in 0.1 M NaPi under/without AM 1.5G irradiation, the temperature of 0.1 M NaPi was controlled at different temperatures.

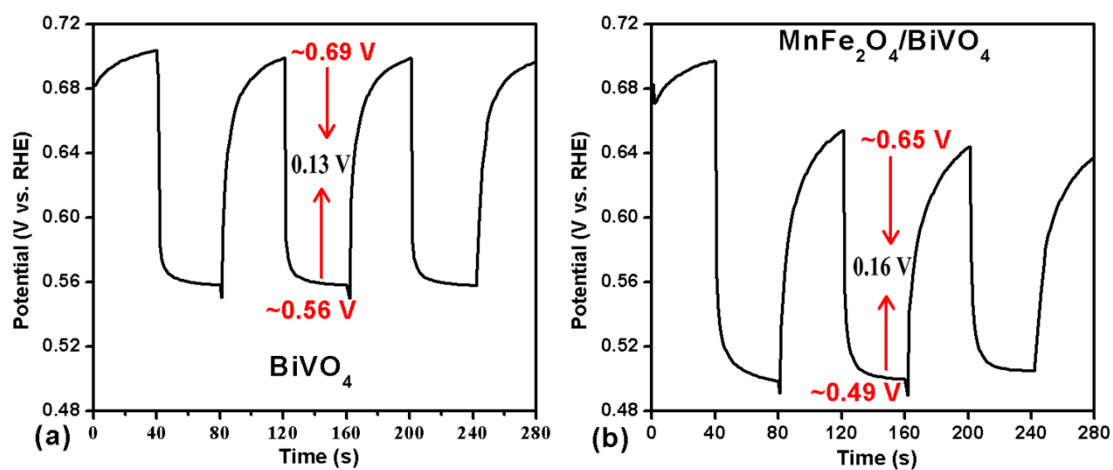

**Fig. S8** The OCP of BiVO<sub>4</sub> and MnFe<sub>2</sub>O<sub>4</sub>/BiVO<sub>4</sub> film photoanodes in 0.1 M NaPi under 1.5G illumination and in dark, respectively.

## References

1. Yuan *et al.*, A novel BiVO<sub>4</sub>/DLC heterojunction for efficient photoelectrochemical water splitting, Chem. Eng. J. 2023, 459, 141637.
2. Kubendhiran *et al.*, Enhanced photoelectrochemical water oxidation on BiVO<sub>4</sub> by addition of ZnCo-MOFs as effective hole transfer co-catalyst, Int. J. Hydrog. Energy 2023, 48, 101-112.
3. Yang *et al.*, Manipulating the surface states of BiVO<sub>4</sub> through electrochemical reduction for enhanced PEC water oxidation, Nanoscale 2023, 15, 4536-4545.
4. Wang *et al.*, Promoting photoelectrochemical water oxidation of BiVO<sub>4</sub> photoanode via Co-MOF-derived heterostructural cocatalyst, Appl. Surf. Sci. 2023, 619, 156710.
5. He *et al.*, Photothermal-enhanced solar water oxidation on NiO/amorphous carbon/BiVO<sub>4</sub> and CoOx/amorphous carbon/BiVO<sub>4</sub> photoanodes, Catal. Sci. Technol. 2023, 13, 5776-5784.
